# Supplementary material for: Prognostic role and functional impact of cadherin genes in non-small cell lung cancer tumorigenesis: mechanistic insights from in silico and in vitro analyses
Source: PeerJ. 2025 Aug 19;13:e19785. doi: 10.7717/peerj.19785 (PMC12372785; doi:10.7717/peerj.19785)
Supplement: Supplemental Information 1 [file peerj-13-19785-s001.xls]

## Sheet: Sheet1
ITEM TO CHECK	IMPORTANCE	CHECKLIST
EXPERIMENTAL DESIGN
Definition of experimental and control groups	E	Lines 78-80, Page 3
Number within each group	E	Lines 78-80, Page 3
Assay carried out by core lab or investigator's lab?	D	NA
Acknowledgement of authors' contributions	D	NA
SAMPLE
Description	E	Line 80, Page 3
Volume/mass of sample processed	D	NA
Microdissection or macrodissection	E	NA
Processing procedure	E	Line 88, Page 3
If frozen - how and how quickly?	E	NA
If fixed - with what, how quickly?	E	NA
Sample storage conditions and duration (especially for FFPE samples)	E	NA
NUCLEIC ACID EXTRACTION
Procedure and/or instrumentation	E	Line 88, Page 3
Name of kit and details of any modifications	E	Line 88, Page 3
Source of additional reagents used	D	NA
Details of DNase or RNAse treatment	E	NA
Contamination assessment (DNA or RNA)	E	Line 89, Page 3
Nucleic acid quantification	E	Line 89, Page 3
Instrument and method	E	Line 90, Page 3
Purity (A260/A280)	D	Line 90, Page 3
Yield	D	NA
RNA integrity method/instrument	E	NA
RIN/RQI or Cq of 3' and 5' transcripts	E	NA
Electrophoresis traces	D	NA
Inhibition testing (Cq dilutions, spike or other)	E	NA
REVERSE TRANSCRIPTION
Complete reaction conditions	E	Lines 92-93, Page 3
Amount of RNA and reaction volume	E	Line 92, Page 3
Priming oligonucleotide (if using GSP) and concentration	E	NA
Reverse transcriptase and concentration	E	Line 93, Page 3
Temperature and time	E	Line 94, Page 3
Manufacturer of reagents and catalogue numbers	D	NA
Cqs with and without RT	D*	NA
Storage conditions of cDNA	D	NA
qPCR TARGET INFORMATION
If multiplex, efficiency and LOD of each assay.	E	NA
Sequence accession number	E	NA
Location of amplicon	D	NA
Amplicon length	E	NA
In silico specificity screen (BLAST, etc)	E	NA
Pseudogenes, retropseudogenes or other homologs?	D	NA
Sequence alignment	D	NA
Secondary structure analysis of amplicon	D	NA
Location of each primer by exon or intron (if applicable)	E	NA
What splice variants are targeted?	E	NA
qPCR OLIGONUCLEOTIDES
Primer sequences	E	Line 99-106, Page 3
RTPrimerDB Identification Number	D	NA
Probe sequences	D**	NA
Location and identity of any modifications	E	NA
Manufacturer of oligonucleotides	D	NA
Purification method	D	NA
qPCR PROTOCOL		NA
Complete reaction conditions	E	For CDH1: Stage 1: Activation: 50 °C for 2 min; Stage 2: pre-soak:95 °C for 10 min; Stage 3: Denaturation: 95 °C for 15 sec, Annealing: 60°C for 1 min; Stage 4: Melting curve: 95°C for 15 sec, 60°C for 15 sec, 95°C for 15 sec. For CDH2: Stage 1: Activation: 50 °C for 2 min; Stage 2: pre-soak:95 °C for 10 min; Stage 3: Denaturation: 95 °C for 15 sec, Annealing: 60°C for 1 min; Stage 4: Melting cur…
Reaction volume and amount of cDNA/DNA	E	Line 93, Page 3
Primer, (probe), Mg++ and dNTP concentrations	E	Line 95, Page 3
Polymerase identity and concentration	E	Line 95, Page 3
Buffer/kit identity and manufacturer	E	Line 95, Page 3
Exact chemical constitution of the buffer	D	NA
Additives (SYBR Green I, DMSO, etc.)	E	Line 95, Page 3
Manufacturer of plates/tubes and catalog number	D	Line 96, Page 3
Complete thermocycling parameters	E	NA
Reaction setup (manual/robotic)	D	NA
Manufacturer of qPCR instrument	E	NA
qPCR VALIDATION
Evidence of optimisation (from gradients)	D	NA
Specificity (gel, sequence, melt, or digest)	E	Melt curve analysis was assumed baStandard no-template control (NTC) testingsed on the use of SYBR Green.
For SYBR Green I, Cq of the NTC	E	Standard no-template control (NTC) testing
Standard curves with slope and y-intercept	E	Standard for qPCR
PCR efficiency calculated from slope	E	Standard no-template control (NTC) testing
Confidence interval for PCR efficiency or standard error	D	Calculated from standard curve
r2 of standard curve	E	Acceptable range
Linear dynamic range	E	Acceptable range
Cq variation at lower limit	E	Acceptable range
Confidence intervals throughout range	D	NA
Evidence for limit of detection	E	Acceptable range
If multiplex, efficiency and LOD of each assay.	E	NA
DATA ANALYSIS
qPCR analysis program (source, version)	E	Line 96, Page 3
Cq method determination	E	Line 97, Page 3
Outlier identification and disposition	E	No outlier was detected
Results of NTCs	E	Not applicable
Justification of number and choice of reference genes	E	GAPDH has been frequently used as a single reference gene in similar studies on NSCLC and normal lung tissue-derived cell lines, demonstrating its reliability and consistency under a variety of conditions.
Description of normalisation method	E	For normalization, the relative expression of the target genes (CDH1, CDH2, CDH3) is calculated by normalizing their expression to the expression of a reference gene (GAPDH)
Number and concordance of biological replicates	D	NA
Number and stage (RT or qPCR) of technical replicates	E	Duplicates
Repeatability (intra-assay variation)	E	Acceptable range
Reproducibility (inter-assay variation, %CV)	D	NA
Power analysis	D	NA
Statistical methods for result significance	E	Line 239, Page 6
Software (source, version)	E	Line 239, Page 6
Cq or raw data submission using RDML	D	NA
Table 1. MIQE checklist for authors, reviewers and editors. All essential information (E) must be submitted with the manuscript. Desirable
information (D) should be submitted if available. If using primers obtained from RTPrimerDB, information on qPCR target, oligonucleotides,
protocols and validation is available from that source.
*: Assessing the absence of DNA using a no RT assay is essential when first extracting RNA. Once the sample has been validated as
RDNA-free, inclusion of a no-RT control is desirable, but no longer essential.
**: Disclosure of the probe sequence is highly desirable and strongly encouraged. However, since not all commercial pre-designed assay
vendors provide this information, it cannot be an essential requirement. Use of such assays is advised against.
