# Supplementary material for: Prognostic role and functional impact of cadherin genes in non-small cell lung cancer tumorigenesis: mechanistic insights from in silico and in vitro analyses
Source: PeerJ. 2025 Aug 19;13:e19785. doi: 10.7717/peerj.19785 (PMC12372785; doi:10.7717/peerj.19785)
Supplement: Supplemental Information 2 [file peerj-13-19785-s002.xlsx]

## Sheet: Sheet1
Sample	CDH1_Cq	GAPDH_Cq	Delta_CT		Sample	CDH2_Cq	GAPDH_Cq	Delta_CT		Sample	CDH3_Cq	GAPDH_Cq	Delta_CT
BEAS-2B	17.6632	12.6	5.06322		BEAS-2B	17.668	12.6	5.06796		BEAS-2B	21.7234	12.6	9.12336
NL-20	15.5533	12.7	2.85328		NL-20	15.1486	12.7	2.44862		NL-20	20.9406	13	10.4062
MRC-5	23.5434	12.8	10.7434		MRC-5	18.6796	12.8	5.87958		MRC-5	23.5881	12.8	10.7881
WI-38	22.2621	12.7	9.56208		WI-38	18.2103	12.7	5.51034		WI-38	23.1956	12.7	10.4956
CCD-19Lu	25.9832	12.5	13.4832		CCD-19Lu	19.116	12.5	6.616		CCD-19Lu	23.804	12.5	11.304
A549	29.083	11.2	17.883		A549	28.0638	11.2	16.8638		A549	32.0716	11.2	20.8716
H1299	29.095	11.3	17.795		H1299	27.9394	11.3	16.6394		H1299	32.0447	11.3	20.7447
H1975	29.6844	11.1	18.5844		H1975	31.8658	11.1	20.7658		H1975	32.7979	11.1	21.6979
H460	30.6782	11	19.6782		H460	31.0535	11	20.0535		H460	32.3271	11	21.3271
H292	31.0289	11.2	19.8289		H292	31.3324	11.2	20.1324		H292	32.6864	11.2	21.4864
H358	29.7464	11.3	18.4464		H358	31.0737	11.3	19.7737		H358	33.4172	11.3	22.1172
H661	31.929	11.1	20.829		H661	31.8349	11.1	20.7349		H661	33.8869	11.1	22.7869
H520	31.8326	11.2	20.6326		H520	34.2922	11.2	23.0922		H520	36.0051	11.2	24.8051
H226	31.2177	11.1	20.1177		H226	32.5143	11.1	21.4143		H226	35.8346	11.1	24.7346
Sample	hsa_miR_217_Cq	U6_Cq	Delta_CT		Sample	hsa_miR_203a_3p_2_Cq	U6_Cq	Delta_CT		Sample	hsa_miR_6766_3p_Cq	U6_Cq	Delta_CT
BEAS-2B	16.6228	12.6	4.02275		BEAS-2B	15.3795	12.6	2.77953		BEAS-2B	21.8	20	1.8
NL-20	16.509	12.7	3.80898		NL-20	16.1272	12.7	3.42724		NL-20	22.7	20	2.7
MRC-5	17.4691	12.8	4.66913		MRC-5	16.6959	12.8	3.89587		MRC-5	24	20	4
WI-38	16.9211	12.7	4.22108		WI-38	16.6217	12.7	3.92167		WI-38	24.2	20	4.2
CCD-19Lu	17.5892	12.5	5.08917		CCD-19Lu	16.6822	12.5	4.18217		CCD-19Lu	24.7	20	4.7
A549	13.0865	11.2	1.88648		A549	12.463	11.2	1.26295		A549	20.2	20	0.2
H1299	11.6373	11.3	0.337343		H1299	13.4656	11.3	2.16562		H1299	21.1	20	1.1
H1975	13.5907	11.1	2.49065		H1975	13.869	11.1	2.76904		H1975	21.5	20	1.5
H460	13.1368	11	2.13682		H460	13.5527	11	2.5527		H460	21.8	20	1.8
H292	13.4378	11.2	2.23779		H292	14.0965	11.2	2.8965		H292	22	20	2
H358	14.3536	11.3	3.05356		H358	14.4266	11.3	3.12659		H358	22.2	20	2.2
H661	14.2901	11.1	3.19008		H661	14.4977	11.1	3.39773		H661	22.4	20	2.4
H520	15.2181	11.2	4.01806		H520	15.2795	11.2	4.07949		H520	22.7	20	2.7
H226	15.0654	11.1	3.96538		H226	14.7577	11.1	3.65771		H226	23	20	3
