# Supplementary material for: Prognostic role and functional impact of cadherin genes in non-small cell lung cancer tumorigenesis: mechanistic insights from in silico and in vitro analyses
Source: PeerJ. 2025 Aug 19;13:e19785. doi: 10.7717/peerj.19785 (PMC12372785; doi:10.7717/peerj.19785)
Supplement: Supplemental Information 3 [file peerj-13-19785-s003.xlsx]

## Sheet: Sheet1
Figure 9A			Figure 9C			Figure 9D				Figure 9E			Figure 9G
Condition	Expression		Condition	Expression		Condition	Proliferation (% control)			Condition	Colony numbers		Condition	Wound healing percentage
Ctrl-CDH1-A549	8.5		Ctrl-CDH1-A549	1		Ctrl-A549	98			Ctrl-A549	121		Ctrl-A549	31
Ctrl-CDH1-A549	8.7		Ctrl-CDH1-A549	1.4		Ctrl-A549	99			Ctrl-A549	124		Ctrl-A549	28
Ctrl-CDH1-A549	8.3		Ctrl-CDH1-A549	1.2		Ctrl-A549	100			Ctrl-A549	122		Ctrl-A549	29
Ctrl-CDH2-A549	11.5		Ctrl-CDH2-A549	0.6		si-CDH1-A549	55			si-CDH1-A549	67		si-CDH1-A549	11
Ctrl-CDH2-A549	11		Ctrl-CDH2-A549	0.73		si-CDH1-A549	56			si-CDH1-A549	65		si-CDH1-A549	11.5
Ctrl-CDH2-A549	11.4		Ctrl-CDH2-A549	0.86		si-CDH1-A549	57			si-CDH1-A549	67		si-CDH1-A549	12
si-CDH1-A549	5.5		si-CDH1-A549	1		si-CDH2-A549	54			si-CDH2-A549	48		si-CDH2-A549	10
si-CDH1-A549	5.4		si-CDH1-A549	1.11		si-CDH2-A549	55			si-CDH2-A549	44		si-CDH2-A549	8.1
si-CDH1-A549	5.6		si-CDH1-A549	1.21		si-CDH2-A549	56			si-CDH2-A549	46		si-CDH2-A549	7.1
si-CDH2-A549	6		si-CDH2-A549	0.5
si-CDH2-A549	5.9		si-CDH2-A549	0.62
si-CDH2-A549	6.1		si-CDH2-A549	0.74
